# Supplementary material
Source: ML conference proceedings conference paper supplement (https://openreview.net/forum?id=Sn4eoPLi9lq)
Supplement: supplementary_material [file attachment]

**Patient 1**

**Features:**  
**Symptoms, Imaging**

**Examination**

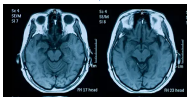

**Nausea,  
Headache,  
Blurry vision**

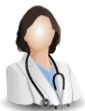

**"moderate  
concussion"**

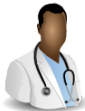

**"mild  
concussion"**

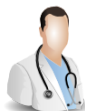

**"moderate  
concussion"**

**Patient 2**

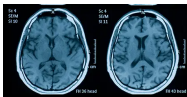

**Vomiting,  
Blurry vision**

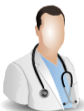

**"moderate  
concussion"**

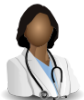

**"severe  
concussion"**
