# Supplementary material
Source: ML conference proceedings conference paper supplement (https://openreview.net/forum?id=Sn4eoPLi9lq)
Supplement: supplementary_material [file attachment]

## GNB Models

estimates  $P^{\mathcal{M}}; do[Z=\{h'\}](Y_{h'} | X)$

## CNB Models

estimates  $P^{\mathcal{M}}; do[Z=\{h,h'\}](Y_{h'} | Y_h)$  for  $h \in \mathcal{H}$

### Gumbel-Max SI-SCM $\mathcal{M}(\Psi)$

estimates

$P^{\mathcal{M}(\Psi)} | X=x, Z=\{h\}, \mathbf{Y}=y_h; do[Z=\{h\}](Y_{h'} | X)$

### GNB Baseline

estimates

$P^{\mathcal{M}}; do[Z=\{h'\}](Y_{h'} | X)$

### GNB + CNB Baseline

estimates

$P^{\mathcal{M}}; do[Z=\{h'\}](Y_{h'} | X) \times P^{\mathcal{M}}; do[Z=\{h,h'\}](Y_{h'} | Y_h)$
