# Supplementary material
Source: ML conference proceedings conference paper supplement (https://openreview.net/forum?id=Sn4eoPLi9lq)
Supplement: supplementary_material [file attachment]

Expert's Label Prediction

|            |          |            |      |      |      |      |      |       |      |       |
|------------|----------|------------|------|------|------|------|------|-------|------|-------|
| airplane   | 0.62     | 0.07       | 0.06 | 0.01 | 0.01 | 0.06 | 0.01 | 0.09  | 0.07 | 0.00  |
| automobile | 0.03     | 0.66       | 0.01 | 0.00 | 0.03 | 0.00 | 0.00 | 0.01  | 0.11 | 0.14  |
| bird       | 0.03     | 0.01       | 0.55 | 0.09 | 0.21 | 0.01 | 0.03 | 0.04  | 0.03 | 0.00  |
| cat        | 0.04     | 0.01       | 0.10 | 0.54 | 0.09 | 0.13 | 0.05 | 0.04  | 0.01 | 0.00  |
| deer       | 0.03     | 0.02       | 0.05 | 0.00 | 0.68 | 0.02 | 0.02 | 0.16  | 0.01 | 0.00  |
| dog        | 0.08     | 0.01       | 0.04 | 0.13 | 0.10 | 0.53 | 0.05 | 0.06  | 0.00 | 0.00  |
| frog       | 0.03     | 0.00       | 0.16 | 0.07 | 0.13 | 0.07 | 0.54 | 0.00  | 0.00 | 0.00  |
| horse      | 0.01     | 0.00       | 0.03 | 0.01 | 0.18 | 0.03 | 0.01 | 0.72  | 0.00 | 0.02  |
| ship       | 0.12     | 0.05       | 0.01 | 0.06 | 0.02 | 0.02 | 0.02 | 0.04  | 0.64 | 0.02  |
| truck      | 0.00     | 0.12       | 0.02 | 0.03 | 0.03 | 0.03 | 0.00 | 0.00  | 0.00 | 0.78  |
|            | airplane | automobile | bird | cat  | deer | dog  | frog | horse | ship | truck |

Model's Prediction of Expert's Label
