# Supplementary material
Source: ML conference proceedings conference paper supplement (https://openreview.net/forum?id=Sn4eoPLi9lq)
Supplement: supplementary_material [file attachment]

Learn conditional  $P(Y_h \mid X = x)$

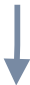

Build graph  $\mathcal{G} = (\mathcal{H}, \mathcal{E})$  :

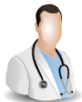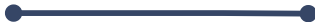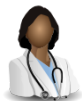

$$\{h, h'\} \in \mathcal{E}$$

iff counterfactual stability is not violated for pair given the data and learned marginals

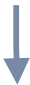

$\Psi$  is greedy approx. of clique cover of  $\mathcal{G}$  minimizing

$$\sum_{h, h' \in \mathcal{H}} \underbrace{\mathcal{L}(\mathcal{M}(\Psi), h', h)}_{\text{average empirical loss of inferring } Y_{h'} \text{ given } Y_h} - \underbrace{\mathcal{L}(\mathcal{M}(\mathcal{H}), h', h)}_{\text{model with no similar experts}}$$

average empirical loss of  
inferring  $Y_{h'}$  given  $Y_h$

model with no  
similar experts
