# Supplementary material
Source: ML conference proceedings conference paper supplement (https://openreview.net/forum?id=Sn4eoPLi9lq)
Supplement: supplementary_material [file attachment]

## Examination

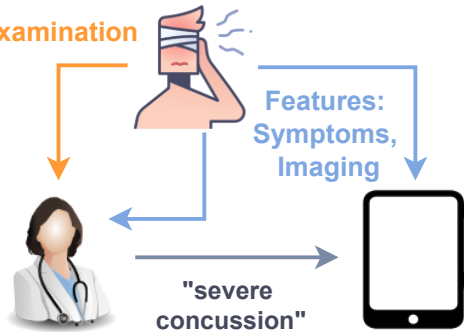

## 1. Second Opinions

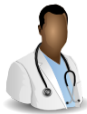

"moderate  
concussion"

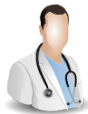

"severe  
concussion"

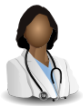

"severe  
concussion"

## 2. Consensus (e.g. majority)

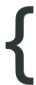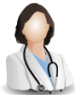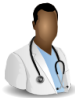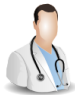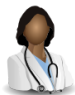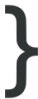

"severe concussion"
