# Supplementary material
Source: ML conference proceedings conference paper supplement (https://openreview.net/forum?id=Sn4eoPLi9lq)
Supplement: supplementary_material [file attachment]

Expert's Label Prediction

|            |          |            |      |      |      |      |      |       |      |       |
|------------|----------|------------|------|------|------|------|------|-------|------|-------|
| airplane   | 0.61     | 0.07       | 0.06 | 0.00 | 0.03 | 0.07 | 0.01 | 0.09  | 0.06 | 0.00  |
| automobile | 0.06     | 0.52       | 0.02 | 0.01 | 0.04 | 0.01 | 0.00 | 0.01  | 0.15 | 0.20  |
| bird       | 0.02     | 0.01       | 0.39 | 0.10 | 0.26 | 0.03 | 0.09 | 0.05  | 0.04 | 0.01  |
| cat        | 0.08     | 0.00       | 0.08 | 0.39 | 0.12 | 0.15 | 0.07 | 0.10  | 0.01 | 0.00  |
| deer       | 0.03     | 0.01       | 0.07 | 0.03 | 0.54 | 0.02 | 0.12 | 0.16  | 0.01 | 0.01  |
| dog        | 0.05     | 0.00       | 0.05 | 0.24 | 0.13 | 0.34 | 0.06 | 0.11  | 0.01 | 0.01  |
| frog       | 0.03     | 0.00       | 0.16 | 0.14 | 0.20 | 0.07 | 0.37 | 0.01  | 0.00 | 0.02  |
| horse      | 0.00     | 0.03       | 0.05 | 0.01 | 0.25 | 0.07 | 0.01 | 0.54  | 0.00 | 0.03  |
| ship       | 0.20     | 0.06       | 0.01 | 0.06 | 0.01 | 0.02 | 0.05 | 0.05  | 0.54 | 0.01  |
| truck      | 0.06     | 0.10       | 0.01 | 0.04 | 0.03 | 0.03 | 0.00 | 0.00  | 0.01 | 0.72  |
|            | airplane | automobile | bird | cat  | deer | dog  | frog | horse | ship | truck |

Model's Prediction of Expert's Label
