# Supplementary material
Source: ML conference proceedings conference paper supplement (https://openreview.net/forum?id=Sn4eoPLi9lq)
Supplement: supplementary_material [file attachment]

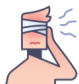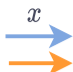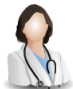

**Observed Expert's Label**

$$Y_h = f_h(x, ?) = c$$

No

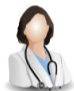

in  $\psi \in \Psi$ ?

Yes

**Sampling Noise**

$$U = (U_\psi)_{\psi \in \Psi}$$

$$\forall c \in \mathcal{Y} : U_{\psi,c} \sim \underbrace{Gumbel(0, 1)}_{\text{Prior}} \quad U_\psi \sim P^{\mathcal{M}(\Psi) | X=x, Z=\{h\}, \mathbf{Y}=c; do[Z=\{h'\}]}(U_\psi)$$

sample from the noise posterior  
e.g. via rejection sampling

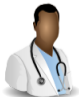

$$h' \in \mathcal{H}$$

$$Y_{h'} = f_{h'}(x, U_{\psi(h')})$$

**Counterfactual Label Sample**  
for estimating the distribution
